# Supplementary material
Source: PubMed Central journal article supplement (PMC8478459)
Supplement: aem.01208-21-s0001.pdf [file aem.01208-21-s0001.pdf]

## SUPPLEMENTAL

**Table S1.** The range of nucleotides and variants seen in each sample comparison for the training data set.  $F_{ST}$  estimations were calculated for each nucleotide in common between two samples (Individual A and Individual B). Then all  $F_{ST}$  values greater than 0 ( $F_{ST} > 0$ ) were used to calculate the minimum, median, mean, and maximum. Additionally, the number of  $F_{ST}$  estimates higher than 0.10, 0.25, and 0.50 were determined for each comparison. S0## represents an individual, and R# represents the replicate.

**Attached excel worksheet.**

**Table S2.** Votes and rank of classes for sample S028\_R3 for *per marker* and *overall* method.

The total number of votes possible via SVM for the training data set was 25 votes. Sample S028\_R3 had no classification obtaining 25 votes. For classes that received the same number of votes, the mean prediction percentage was used to break the tie.

| Votes | Classification | Rank |
|-------|----------------|------|
| 24    | S036           | 1    |
| 23    | S029           | 2    |
| 22    | S007           | 3    |
| 22    | S004           | 4    |
| 22    | S025           | 5    |
| 20    | S008           | 6    |
| 20    | S006           | 7    |
| 18    | S001           | 8    |
| 18    | S010           | 9    |
| 16    | S028           | 10   |
